# Supplementary material for: Highly efficient perovskite solar cells based on a dopant-free conjugated DPP polymer hole transport layer: influence of solvent vapor annealing
Source: Royal Society of Chemistry journal article supplement (doi:10.1039/c8se00233a), 2018-01-01
Supplement: c8se00233a1.pdf [file c8se00233a1.pdf]

Supporting Information for

**High Efficient Perovskite Solar Cells Based On Dopant-Free  
Conjugated DPP Polymer Hole Transport Layer: Influence of  
Solvent Vapor Annealing**

Xing Guo,<sup>a</sup> Bingjuan Zhang,<sup>a</sup> Zenhua Lin,<sup>a\*</sup> Jie Su,<sup>a</sup> Zhou Yang,<sup>b</sup> Chunfu Zhang,<sup>a</sup>  
Jingjing Chang,<sup>a\*</sup> Shengzhong (Frank) Liu,<sup>b</sup> Yue Hao<sup>a</sup>

<sup>a</sup>Department State Key Discipline Laboratory of Wide Band Gap Semiconductor  
Technology, Shaanxi Joint Key Laboratory of Graphene, School of Microelectronics,  
Xidian University, 2 South Taibai Road, Xi'an, 710071, China.

E-mail: jjingchang@xidian.edu.cn; zhlin@xidian.edu.cn

<sup>b</sup>Key Laboratory of Applied Surface and Colloid Chemistry, National Ministry of  
Education; Shaanxi Engineering Lab for Advanced Energy Technology, School of  
Materials Science and Engineering, Shaanxi Normal University, Xi'an 710119, China.

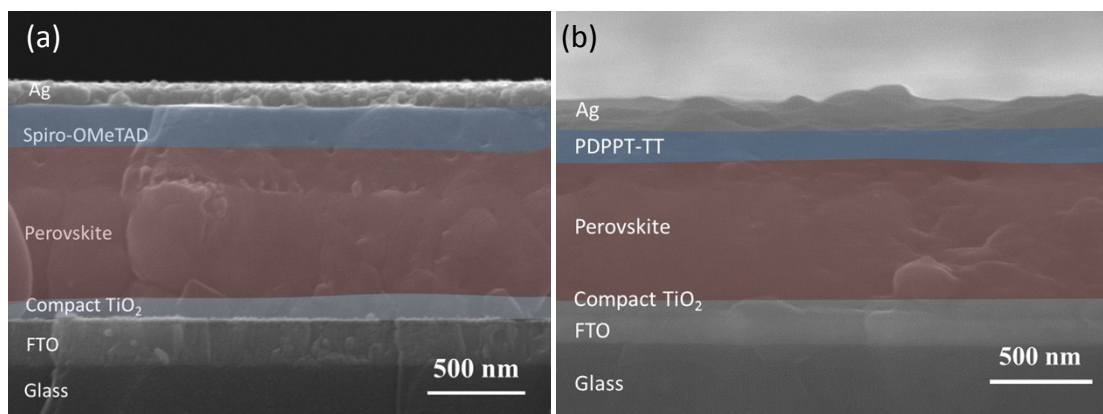

**Figure S1.** The cross-section SEM image of the devices based on different HTLs.

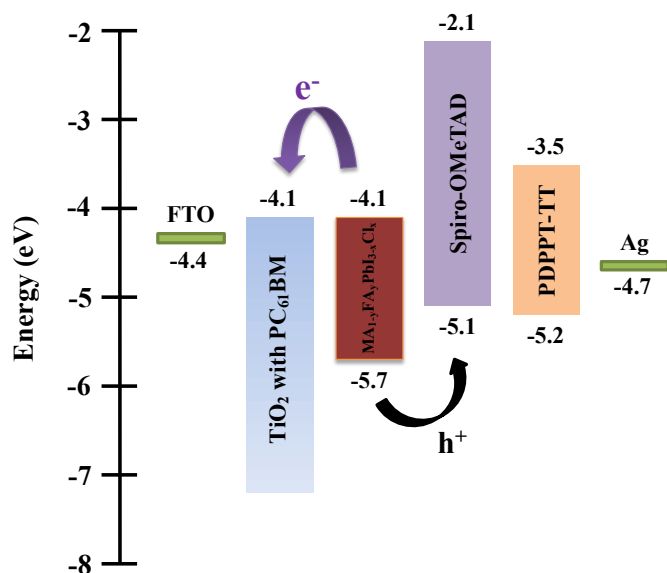

**Figure S2.** The energy band diagram of different materials in the device.

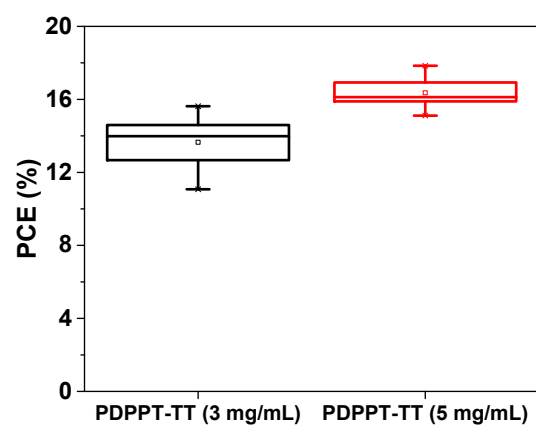

**Figure S3.** Statistical PCE distribution of perovskite solar cells based on different concentrations of PDPPT-TT solution.

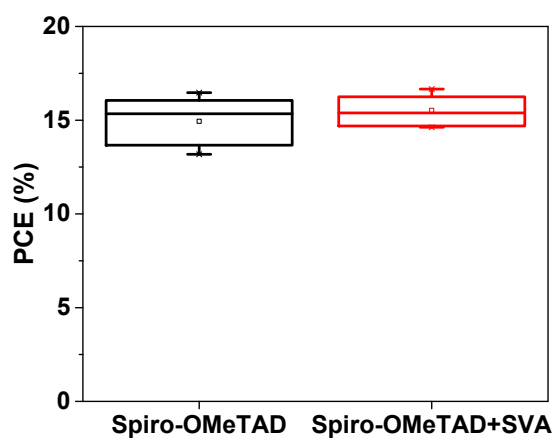

**Figure S4.** PCE statistics of the perovskite devices based on Spiro-OMeTAD and Spiro-OMeTAD+SVA.

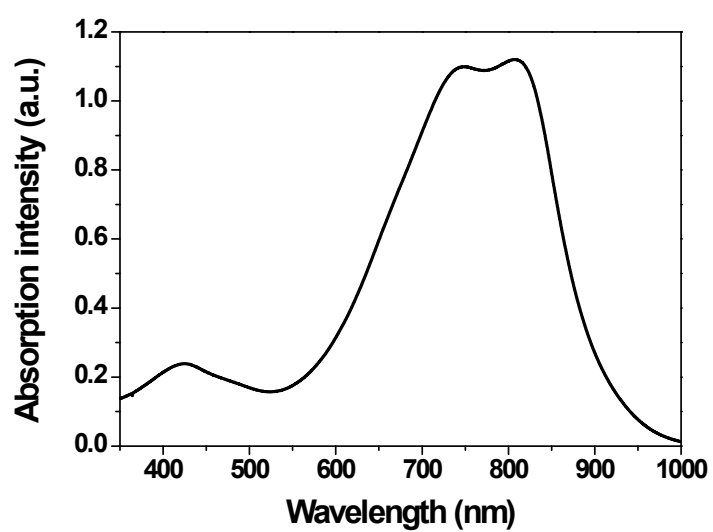

**Figure S5.** UV-vis absorption of PDPPT-TT thin film.

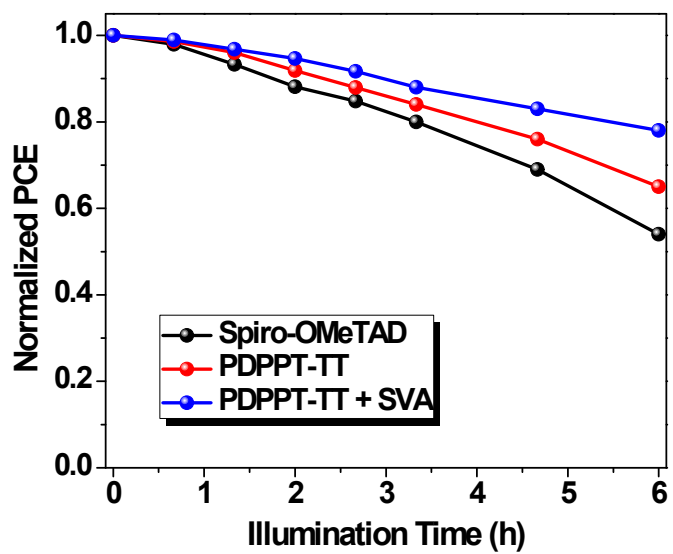

**Figure S6.** The device stabilities as a function of illumination time using ISOS-L1 protocols without excluding the UV-light.

**Table S1.** Fitted decay times of perovskite thin films deposited on different HTLs.

|              | Fraction 1 | $\tau_1$ (ns) | Fraction 2 | $\tau_2$ (ns) | $\tau_{ave}$ (ns) |
|--------------|------------|---------------|------------|---------------|-------------------|
| Spiro-OMeTAD | 0.41       | 3.54          | 0.59       | 18.69         | 12.53             |
| PDPPT-TT     | 0.46       | 6.27          | 0.54       | 32.64         | 20.45             |
| PDPPT-TT+SVA | 0.56       | 3.99          | 0.44       | 26.54         | 13.90             |

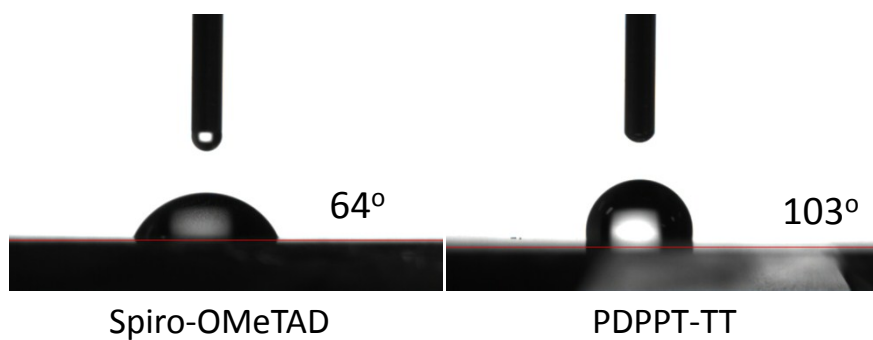

**Figure S7.** Water contact angle measurements based on Spiro-OMeTAD and PDPPT-TT polymers.
